# Supplementary material for: Borneol promotes autophagic degradation of HIF-1α and enhances chemotherapy sensitivity in malignant glioma
Source: PeerJ journal article supplement (doi:10.7717/peerj.16691), 2024-01-03
Supplement: raw_data1.pdf [file raw_data1.pdf]

# CCK8

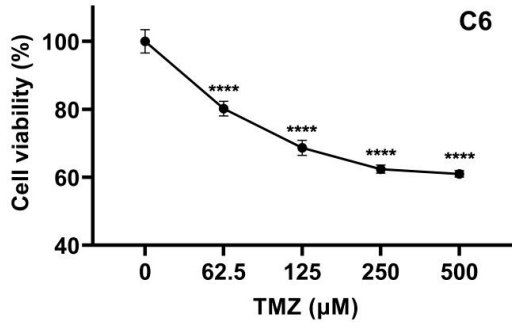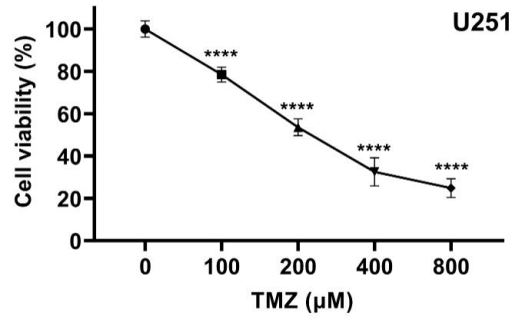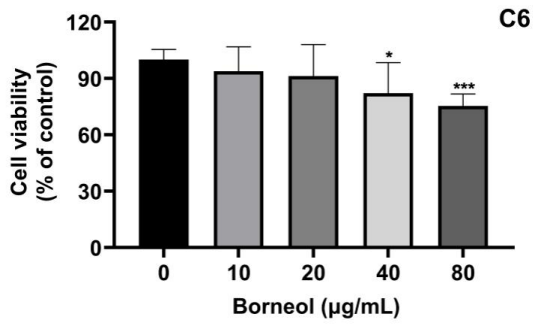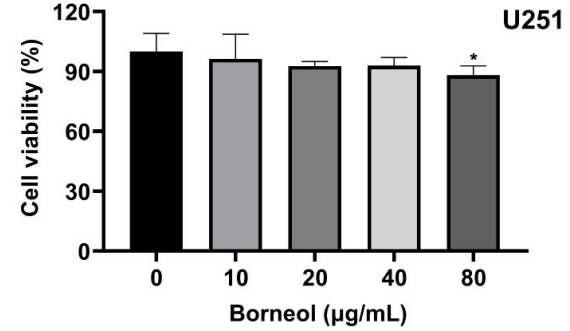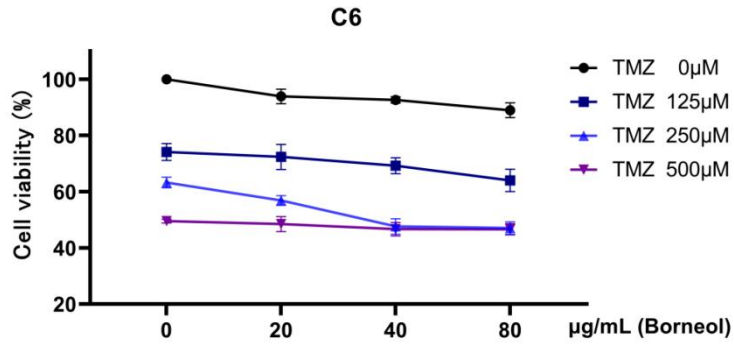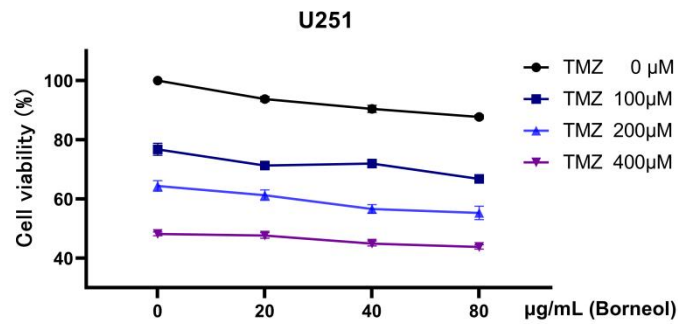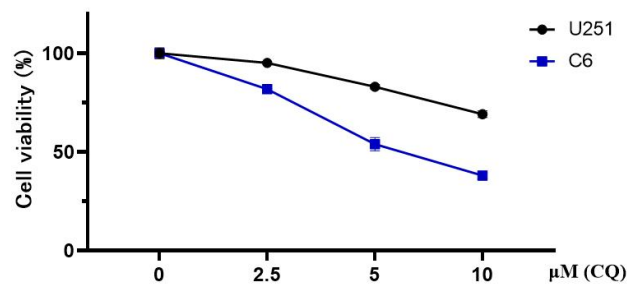

# Clonogenic assay

## C6

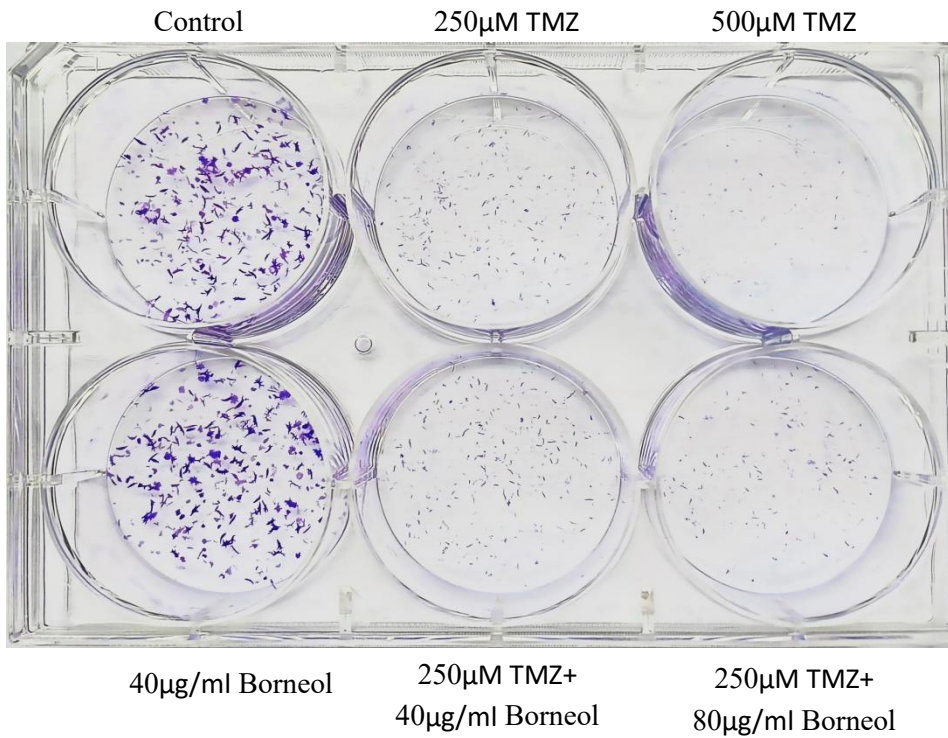

## U251

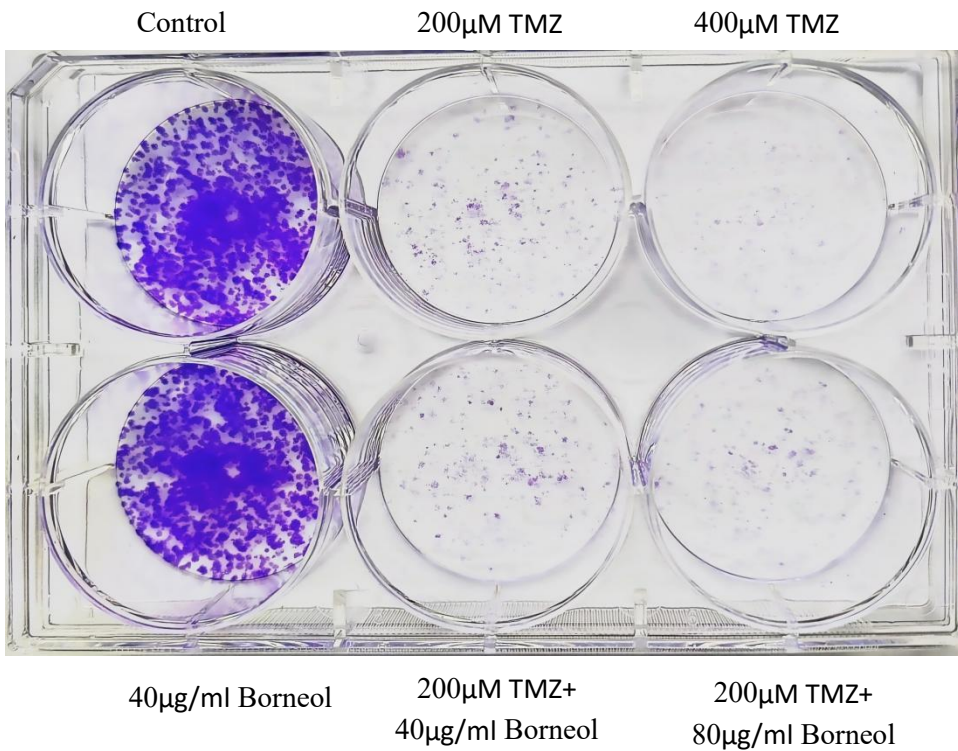

# HE

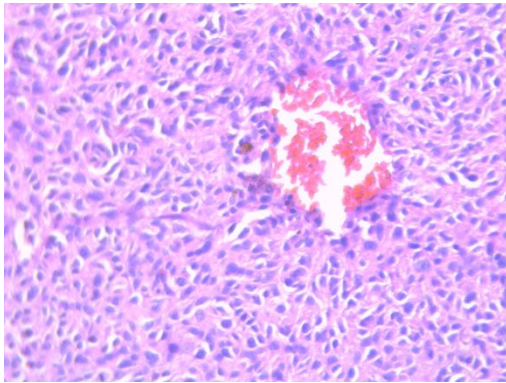

Control

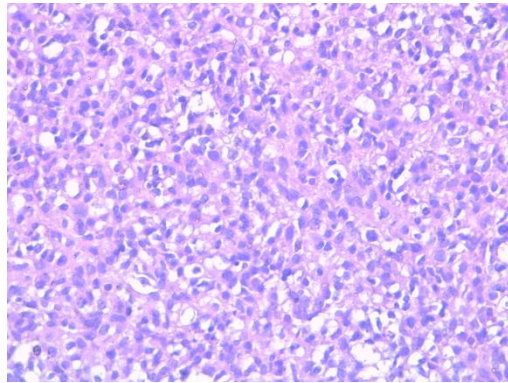

Borneol

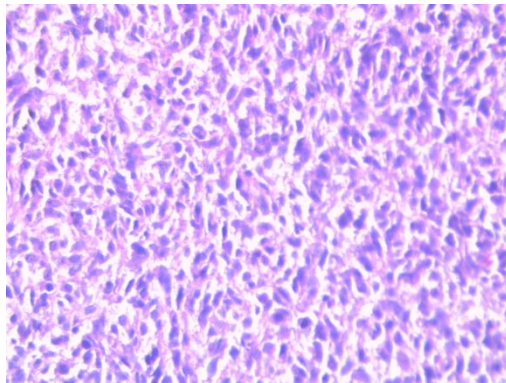

TMZ

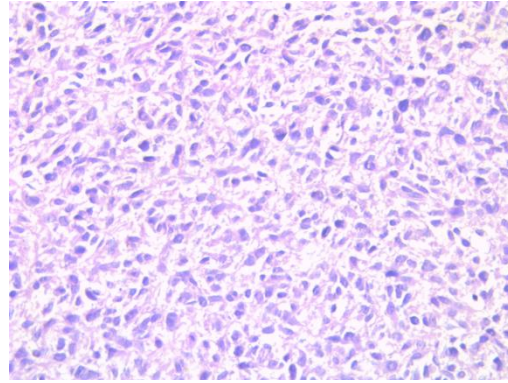

TMZ+Borneol

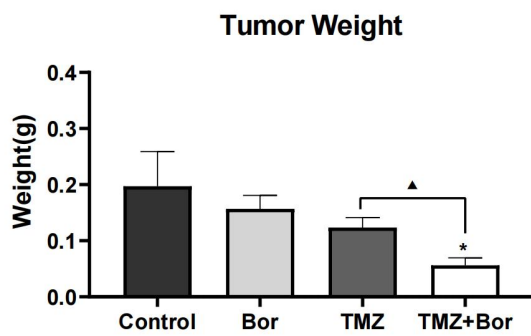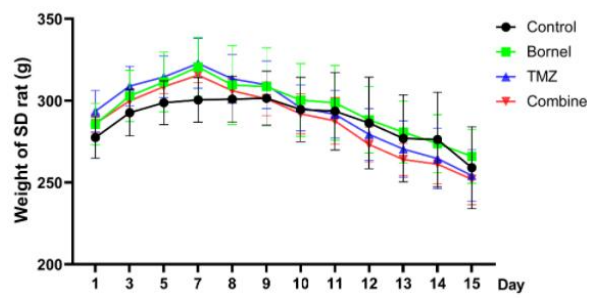

# TEM

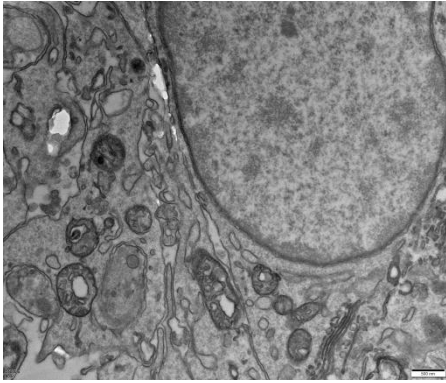

**Control**

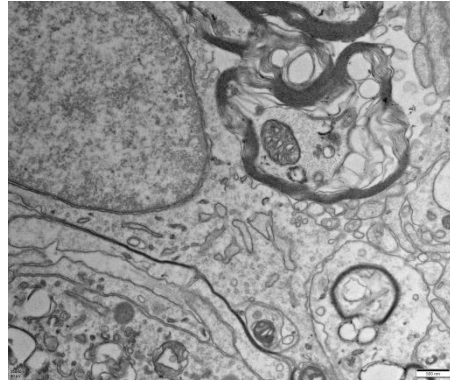

**Borneol**

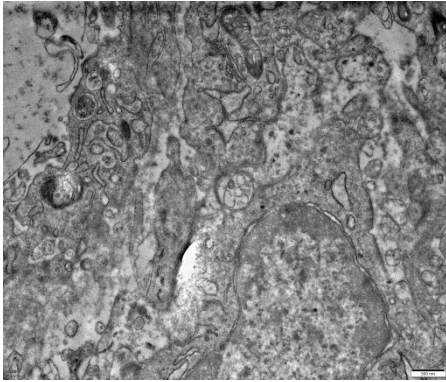

**TMZ**

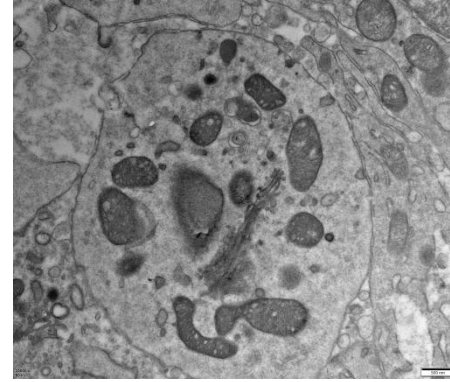

**TMZ+Borneol**



# IHC

## HIF-1 $\alpha$

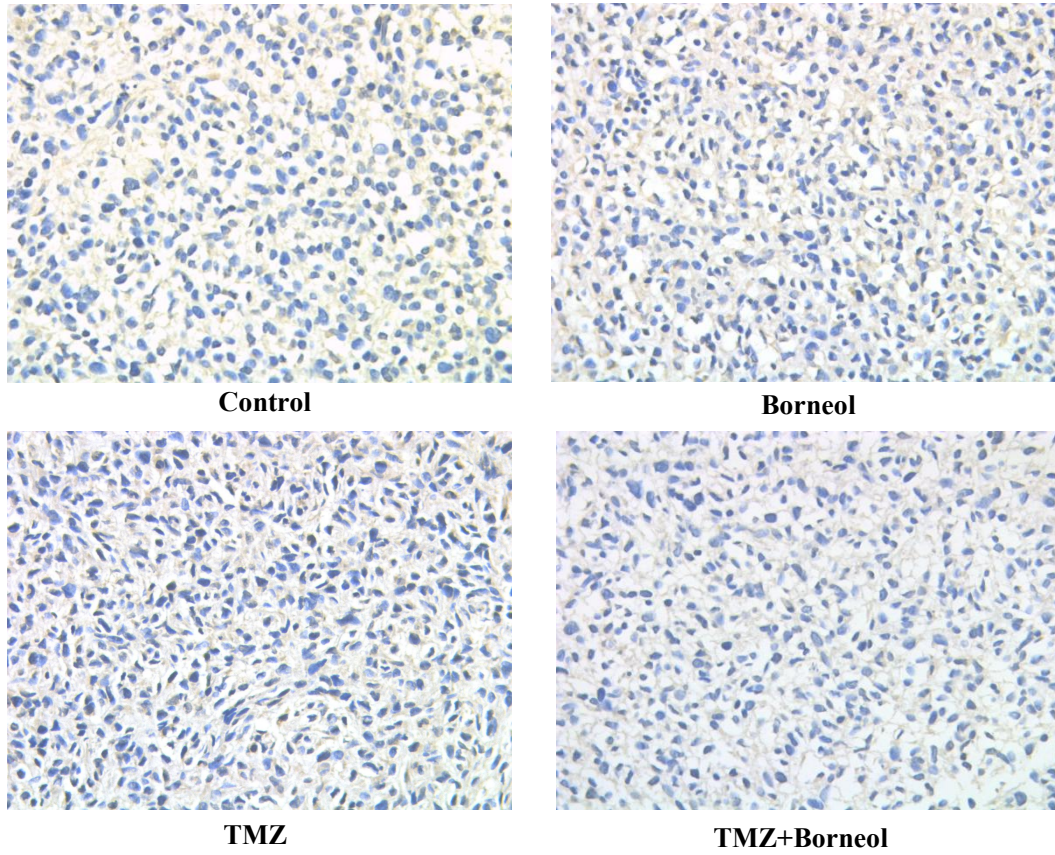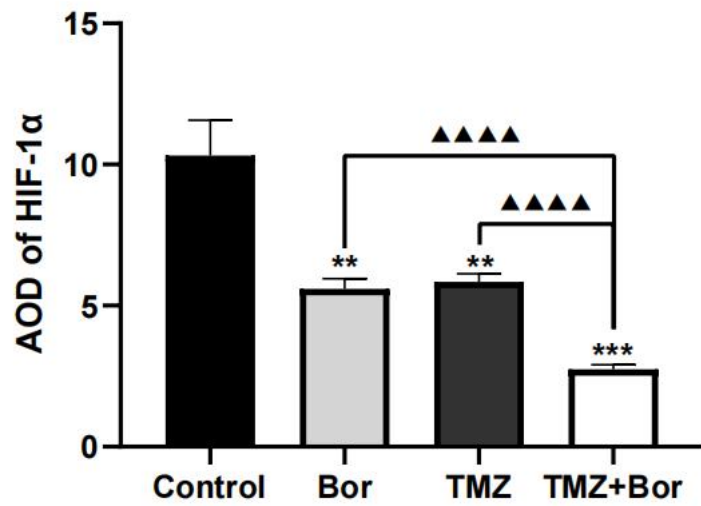

# IHC

## Beclin-1

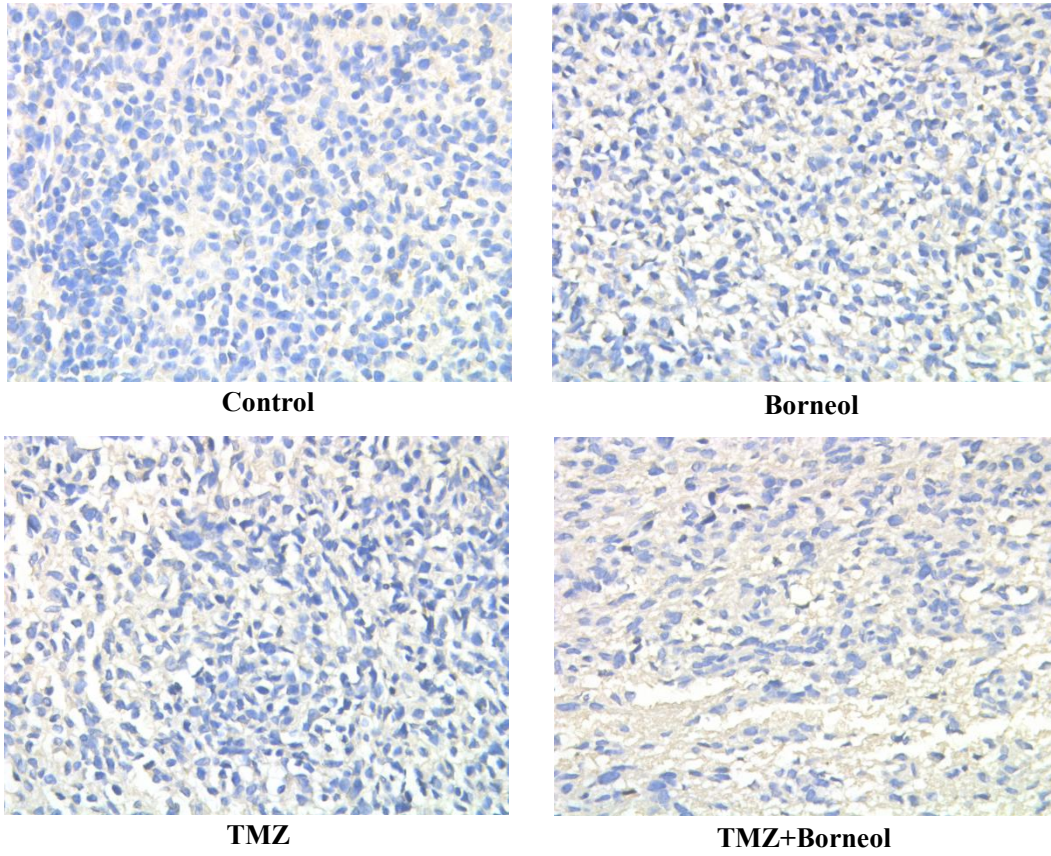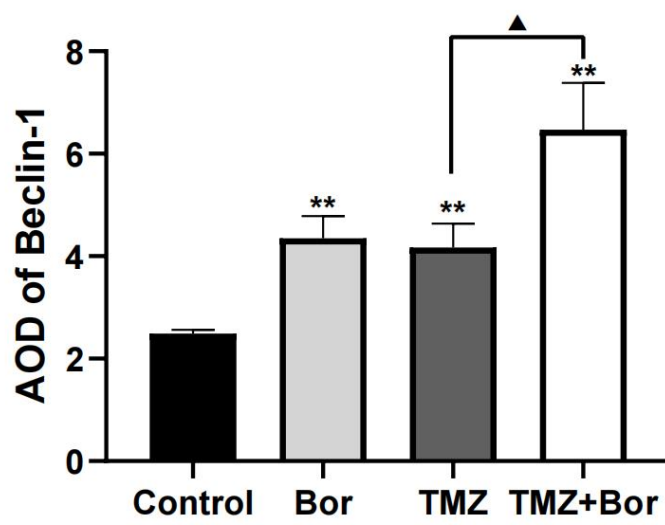



# IHC

## LC3A/B

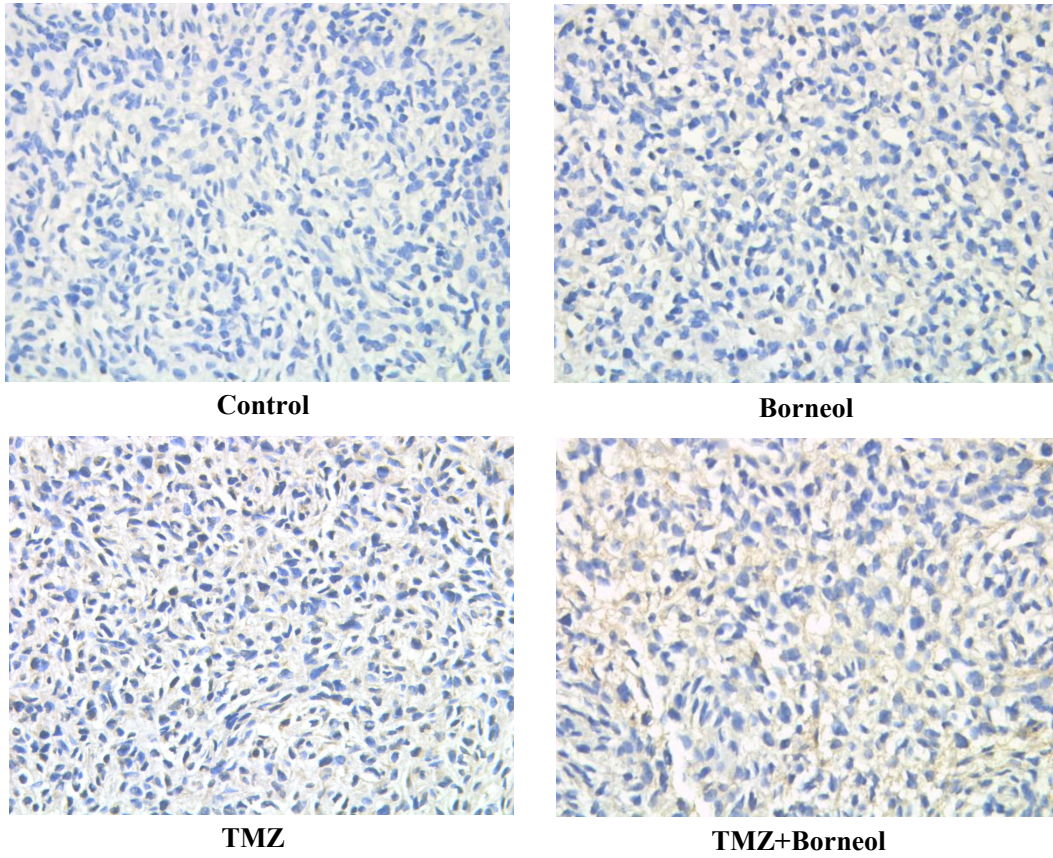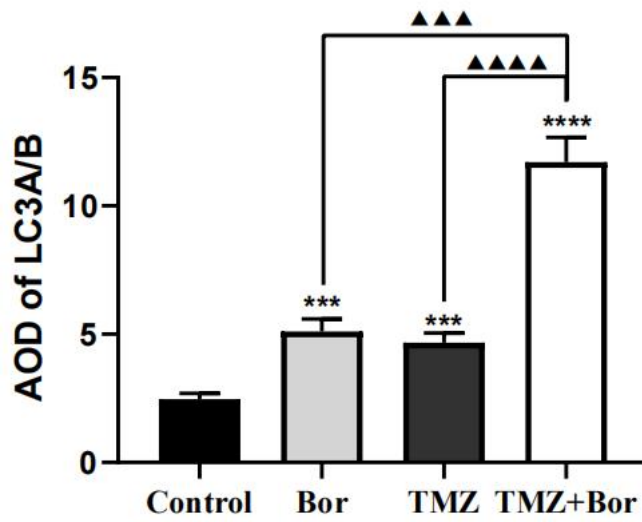

# Apoptosis

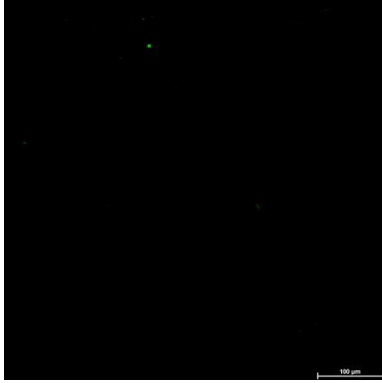

**Control**

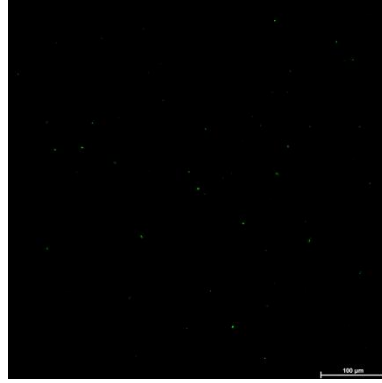

**Borneol**

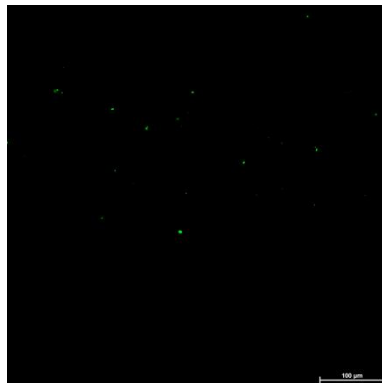

**TMZ**

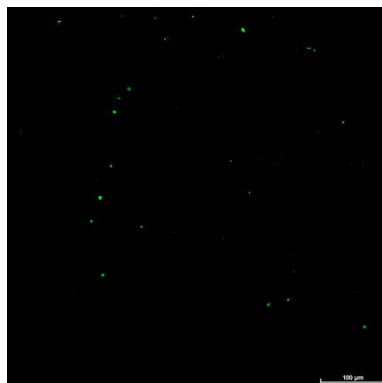

**TMZ+Borneol**
