# Supplementary material for: Borneol promotes autophagic degradation of HIF-1α and enhances chemotherapy sensitivity in malignant glioma
Source: PeerJ. 2024 Jan 3;12:e16691. doi: 10.7717/peerj.16691 (PMC10771087; doi:10.7717/peerj.16691)
Supplement: Supplemental Information 3 [file peerj-12-16691-s003.xlsx]

## Sheet: CCK8
C6-TMZ/µM						C6-Borneol(µg/ml)
Con	62.5T	125T	250T	500T		con	10B	20B	40B	80B
1.0522	0.804241	0.709625	0.631321	0.621533		0.961965	0.744849	0.697306	0.684628	0.643423
1.01468	0.82708	0.665579	0.619902	0.616639		1.01109	1.03962	0.771791	0.743265	0.771791
0.980424	0.769984	0.660685	0.608483	0.600326		0.974643	1.06656	0.974643	0.683043	0.751189
0.988581	0.796085	0.7031	0.621533	0.611746		1.09033	0.885895	1.0523	1.00951	0.805071
0.964111	0.814029	0.694943	0.639478	0.600326		0.96355	0.957211	1.06656	0.985737	0.793978
U251-TMZ/µM						U251-Borneol(µg/ml)
Control	100T	200T	400T	800T		Con	10B	20B	40B	80B
1.03714	0.822857	0.572857	0.421429	0.247143		1.14559	1.17325	0.935866	0.982979	0.860942
0.985714	0.794286	0.564286	0.354286	0.205714		0.902736	0.964438	0.919453	0.903343	0.868237
1.00571	0.762857	0.504286	0.267143	0.218571		1.00775	0.89848	0.894529	0.890578	0.849544
0.942857	0.737143	0.484286	0.261429	0.252857		0.952128	0.918997	0.927356	0.903647	0.862918
1.03	0.808571	0.555714	0.324286	0.32		0.988906	0.860182	0.957751	0.962006	0.963374
C6-TMZ(µM)+Borneol(µg/ml)
	0T					125T					250T					500T
0B	102.13	99.4	98.87	99.56	100.15	78.48	75.76	72.96	71.06	72.34	64.87	62.84	60.9	62.11	65.36	49.9	48.79	49.63	48.97	50.44
20B	93.97	93.79	92.51	91.14	98.06	75.23	67.34	69.61	71.15	78.51	57.69	57.79	56.13	54.25	58.56	50.21	47.06	45.16	47.8	51.97
40B	93.12	91.87	91.38	92.59	94.31	69.27	66.57	69.68	66.97	73.64	50.58	45.28	45.55	45.93	50.66	46.52	45.84	44.55	45.67	50.68
80B	92.96	87.77	85.85	89.05	89.28	61.81	60.49	61.29	66.64	69.61	47.9	45.7	46.07	44.92	50.47	45.06	45.06	46.24	46.73	49.9
U251-TMZ(µM)+Borneol(µg/ml)
	0T					100T					200T					400T
0B	101.86	99	101.17	98.43	99.59	78.97	82.21	70.14	77.33	75.23	69.56	65.42	66.1	59.38	61.4	47.18	50.07	48.39	48.8	46.51
20B	93.46	97.08	92.43	92.44	93.25	70.86	74.94	73.35	69.13	68.12	64.33	64.05	63.83	55.5	58.74	45.07	49.17	50.22	45.97	47.94
40B	91.92	91.33	86.75	88.72	93.37	69.75	76.15	73.46	72.1	68.46	55.4	61.28	53.66	54.16	58.56	41.69	45.43	45.17	46.24	46.22
80B	87.44	85.34	88.98	87.92	88.82	68.3	65.13	64.77	69.57	66.13	61.54	58.29	49.24	55.9	51.47	43.38	44.24	45.55	41.27	44.5
“T” refers to TMZ in µM and “B” represents borneol in µg/mL.
Chloroquine (µM)
CQ/µM	U251					C6
0	109.71	99.28	101.52	93.44	96.06	101.48	103.08	98.21	98.56	98.67
2.5	97.43	96.65	99.6	91.02	90.96	84.76	86.11	84.89	79.01	74.58
5	83.89	85.72	84.32	81.8	79.44	62.4	55.52	57.33	51.62	42.68
10	64.74	71.95	73.51	69.54	65.83	39.48	41.63	38.39	38.26	32.38

## Sheet: tumor weight and rat weight
tumor weight/g						SD rat weight/g
Control	Bor	TMZ	TMZ+Bor			Day	Control						Bornel						TMZ						Combine
0.293	0.143	0.196	0.101			1	278.4	286.4	289.1	285	255.5	270.5	289	289.2	265.6	294.4	300	275.7	286.3	289.1	309.1	276.6	293	307.4	286	290.6	294.6	280.2	285	280.1
0.38	0.174	0.067	0.063			3	296.5	303.8	304	296.5	266	289	310	310.9	276.7	310	318.2	291.6	297	305.2	325.1	295.5	310.6	320	298	306.5	304	307.6	293.3	289.7
0.034	0.067	0.103	0.03			5	299.6	305.8	308	309	273.4	296.8	319	312.4	283.7	324.3	332.4	296.7	304.2	311.4	332.1	300.1	311.5	327.6	308.5	312.4	311.5	311.2	302	305.5
0.072	0.238	0.124	0.085			7	305	308.4	310	309.2	275	295	330.5	318.5	298	340.8	335	300.6	313.1	320	345.6	310.5	310	337.6	320	313	319.4	318	315.1	308.2
0.082	0.192	0.114	0.042			8	310	305.6	316	299.8	275.6	298.8	331.3	302	280.1	328	332.4	283.5	305.4	308.2	338.2	303.7	300.1	324.3	314	302	315.2	300	306.7	298.8
0.323	0.127	0.138	0.016			9	313	301.8	325	303	283.4	283	329.5	298.5	282	329.6	329.7	282.6	305.4	306.3	334.4	298	295.6	318.4	317	294.3	310.2	296	298.4	290.6
						10	313.4	292.1	321.9	290	280.3	270	319.8	289.5	276.7	320.8	320	275.6	293	291.9	315.2	282.6	281	309.8	312.3	283.7	300.4	282	292	281.7
						11	312.3	290.7	328.7	286.8	281	261.9	319.4	286.3	279	322.4	314.7	270.3	295.8	285.2	310.5	275.4	278.3	305.2	311	280.1	298.7	276.8	284	275.5
						12	309.8	278.9	327.2	274.3	248	280.1	307.7	274.6	272.3	307.9	303.7	263.7	285.4	271.2	298.1	262.8	263.4	295.3	285.4	268	286.2	263.8	274.6	261.5
						13	304	270.2	313.3	266.8	264.9	242.6	297.2	264.9	271	295.3	300.2	256.4	281.3	248.2	290.3	261.2	256.7	284.9	268	259.2	280	253.2	267.4	256.2
						14	315.7	281.5	298.8	266.2	261	234.2	294.6	257.4	266.7	287.1	285.3	251.5	280.1	253.4	287.5	242.6	249	275.2	257.3	259.8	284.2	249.1	263	254.1
						15	293	255.3	283.2	251.2	246.6	225	283.5	244.5	265	278.5	276.7	248	270.3	245	273	237.3	239.3	260.7	244.3	247.1	282.6	240	251.5	246.3

## Sheet: AOD of IHC
AOD of IHC
HIF-1α				Beclin 1				LC3A/B
Control	Bor	TMZ	TMZ+Bor	Control	Bor	TMZ	TMZ+Bor	Control	Bor	TMZ	TMZ+Bor
11.8644	6.3476	5.67842	2.99833	2.65868	5.90943	3.72736	8.09193	2.18024	7.30554	5.00556	10.4676
11.342	5.12126	6.20547	3.17679	2.21311	3.33177	2.41367	6.3305	1.91879	5.05755	4.77852	15.5093
14.8829	4.18563	6.60092	2.77602	2.54875	3.88559	4.23362	5.42069	3.51054	5.05958	4.58526	12.5247
9.58548	5.46921	5.06986	2.26225	2.55248	4.88104	5.70131	9.56272	2.34036	4.12562	4.76632	12.7253
6.17506	6.54752	5.02668	2.27276	2.33274	3.20739	5.03882	6.37079	2.31777	5.04903	5.8264	9.12793
8.04598	5.92564	6.51812	2.96336	2.62541	4.89017	3.90739	3.06284	2.57395	4.04762	3.07758	9.88758
